# Supplementary material
Source: publisher site journal article supplement (https://spandidos-publications.com/2521/downloadSupplementary)
Supplement: Supplementary file 1 [file downloadSupplementary]

## Sheet: common lncRNAs in stomach
Probe name	AM group vs NC group																											H-CP group vs AM group
	P-value (Corr)	P-value	FC (abs)	Regulation	PX-1W:rProcessedSignal(raw)	PC-1W:rProcessedSignal(raw)	PC-2W:rProcessedSignal(raw)	NX-2W:rProcessedSignal(raw)	NC-1W:rProcessedSignal(raw)	NC-3W:rProcessedSignal(raw)	PX-1W:rProcessedSignal(normalized)	PC-1W:rProcessedSignal(normalized)	PC-2W:rProcessedSignal(normalized)	NX-2W:rProcessedSignal(normalized)	NC-1W:rProcessedSignal(normalized)	NC-3W:rProcessedSignal(normalized)	probe-SEQUENCE	Chromosome	Strand	Start	End	targetid	Length(bp)	NONCODE	GeneID	Gene symbol	Exon_number	P-value (Corr)	P-value	FC (abs)	Regulation	GX-3W:rProcessedSignal(raw)	GC-1W:rProcessedSignal(raw)	GC-3W:rProcessedSignal(raw)	PX-1W:rProcessedSignal(raw)	PC-1W:rProcessedSignal(raw)	PC-2W:rProcessedSignal(raw)	GX-3W:rProcessedSignal(normalized)	GC-1W:rProcessedSignal(normalized)	GC-3W:rProcessedSignal(normalized)	PX-1W:rProcessedSignal(normalized)	PC-1W:rProcessedSignal(normalized)	PC-2W:rProcessedSignal(normalized)	probe-SEQUENCE	Chromosome	Strand	Start	End	targetid
NONMMUT006946	0.555187	0.00459177	1.52324	down	189.934	226.915	208.261	402.827	356.651	421.644	7.07043	7.22703	7.3484	7.87447	7.68585	7.90697	ACAAAAACACAGGACTTCCAAAGATCAGGTTTATTAAAGGCACTGAGGGTTCCCGAGAGC	12	-	3263747	3266161	ri|4930403I12|PX00715E06|2416	2416	NONMMUT016058	NC	NC	NC	0.249756	0.0246424	3.32925	down	26.0159	57.1334	36.6376	257.303	259.46	156.484	4.87043	6.43245	5.34015	7.4835	7.42783	6.93731	TCAAAAGTTAATCTAGCAGTTAAGCCCTGAGTTCAACTCCCAGTAATATACACCTACATG	10	+	94786136	94787253	NONMMUT006946
NONMMUT005919	0.594314	0.0106401	2.24833	down	130.621	202.542	118.084	311.23	473.52	456.378	6.56357	7.0586	6.53121	7.50233	8.12648	8.03112	GTCTATTTAATAACAATGATGATGGACTGGGTGTTAGGTCCCTTGTACGTTACAAATTAC	4	-	3551322	3553669	ri|B020016M11|PX00325H04|1730	1730	NONMMUT047212	NC	NC	NC	0.217715	0.0167085	3.01567	down	27.9642	36.1589	36.6449	313.651	140.834	159.561	5.29919	5.84519	5.3404	7.7667	6.53056	6.96496	GCTCATTGCGACTCTTGAGTACAAAACAAAAACAAAACTCCCCTGTTCAAATAAACAAAA	10	-	63392638	63553025	NONMMUT005919
NONMMUT029925	0.600041	0.0153507	1.67393	down	236.271	226.314	159.648	344.615	465.954	457.601	7.36717	7.22255	6.96544	7.64987	8.09917	8.03585	ATGTATCATTCTTCTCCCTTTCATCTGACTCCCCTAAAACTTCCTTATGGGGGGAGGTGA	2	-	2222631	2259733	ri|4930412C07|PX00639K22|638	638	NONMMUT037662;NONMMUT037663	NC	NC	NC	0.196314	0.0107875	3.63786	down	97.901	163.492	125.286	656.799	1048.8	685.506	7.04202	7.95021	6.77074	8.79387	9.50977	9.0486	CGGGCTGGGGAGCCAACTAAATCTGATGAAAATGCAATTGCCAAGTCGTTAAGGTATTTG	17	+	48229239	48232590	NONMMUT029925
NONMMUT010600	0.604617	0.0187894	1.78576	down	38.6523	60.6173	57.0195	102.872	144.699	185.288	5.19971	5.46233	5.61671	5.93644	6.28598	6.56594	AGAGTTTCCTCTGAATAAGAAGACATGACTCTCAGAGACCCCGTGAGATTAAATTAAGAC	17	+	4165482	4167494	ri|B230307C02|PX00159E12|2013	2013	NONMMUT030368	NC	NC	NC	0.14068	0.00277168	2.31482	down	64.4175	42.3661	69.5553	200.811	284.148	217.418	6.43749	6.03469	6.01121	7.14544	7.56194	7.40873	TTCTTGTGCTGGGGATGAACTAAGGAATCAAGGATAGACCTTGATGGAGTTGTGGCAAAG	11	+	72257274	72258065	NONMMUT010600
NONMMUT009484	0.60815	0.026341	1.52793	down	960.306	810.039	557.856	1361.8	1431.84	1200.46	9.32101	9.10929	8.76273	9.67395	9.80137	9.55244	ATTGGGAAGACCATCATATTGAAGAACCATGTCAAAGTTCTCCAGGACATACAAGATTCA	13	+	66262284	66278605	NONMMUT018037	458	NONMMUT018037;NONMMUT018039	NONMMUG011282.2	NC	3	0.241948	0.0226106	2.03486	down	79.1093	54.7956	182.575	324.565	297.964	329.679	6.72974	6.3763	7.27945	7.81466	7.63565	8.00998	AACAAAATGCAGGCAGAAAGACTCAACCTATATGTAGACAAGAACCACTCCATGGGCTGG	11	-	46260716	46261687	NONMMUT009484
NONMMUT023865	0.623406	0.0400069	2.24916	down	1275.99	1669.57	941.435	2250.26	3047.81	4338.42	9.74419	10.1983	9.50762	10.4203	10.964	11.574	AGGTGGAGCAAAAGCTAATTCGACTTCCTCCTCCACCTCAGCACTTTTACTTTGTCCTTT	6	+	132225009	132226507	NONMMUT059135	1499	NONMMUT059135	NONMMUG036741.2	NC	1	0.283776	0.0381479	2.04759	down	88.4045	43.2597	100.934	191.627	284.498	305.314	6.89783	6.06147	6.48357	7.0794	7.56423	7.90103	TGATGTTTGTCTCTCTGGGGACCTCTGTGGTTACTGCTTTGTTGTGAATAAATAAGACAT	15	-	2576988	2578006	ri|A330077P12|PX00133C18|1019
LOC105243318	0.623406	0.045707	1.57606	down	1857.08	1827.94	1618.47	2411.51	3419.24	3510.67	10.2968	10.3362	10.3168	10.5204	11.1401	11.2583	AAACAAGACATGAAAACTGGAGGGATGCAGGAGTCATTTCCTGGAGTATGTAAAGATGGT	11	+	24079459	24080839	NONMMUT008958	1378	NONMMUT008958	NONMMUG005560.2	NC	1	0.209166	0.0145901	3.60368	down	1251.91	990.086	4557.61	11138.2	9836.91	8537.82	10.7597	10.5715	11.9634	13.1173	12.9728	12.7528	AGAGAGGTCCATTTGAGTTGGTCGTAGTGACAGTGAGCTTCTCTGGAAATTGCGTATCCT	8	-	3594757	3595409	gi|755528033|ref|XR_879317.1|
NONMMUT070530	0.623406	0.0464658	2.30442	down	552.097	774.258	421.707	990.361	1532.74	2164.27	8.55793	9.039	8.3522	9.18515	9.91209	10.4651	AAACTGAGAGACACTTGTATTTACATCTTGTCCTCATGCTATCCCCATCCAAAAAGCCCT	5	-	3420627	3423867	ri|A330030G03|PX00130N10|3239	3239	NONMMUT054594	NC	NC	NC	0.281009	0.0366946	2.69527	down	175.849	194.338	119.42	879.106	729.554	655.339	7.90186	8.21184	6.71072	9.18413	8.94676	8.98481	CCAGCCTGAGCTAGTGTGAGACCCTTTCCTTAACTGAAAAAATAAAATAATAGAATCTTA	9	+	1383356	1386506	ri|D030011M09|PX00179K16|3152
LOC105245099	0.623406	0.0479908	1.50483	down	4664.42	5643.3	4530.06	7119.47	7510.04	9450.68	11.7445	12.0849	11.827	12.1853	12.4276	12.8122	GAAAATAATTGCTGCAAAAGATGACTCTGCCTCTCCCTCGGGCCTCAGTTTACACTTCAT	8	+	128483974	128488232	NONMMUT067758	1131	NONMMUT067758;NONMMUT067759	NONMMUG041952.2	NC	2	0.242528	0.0227897	2.48088	down	347.851	479.748	410.952	2063.34	1914.65	1220.52	8.9032	9.50741	8.4063	10.4473	10.4056	9.89655	GTCAATTGGATCAGATAATGGGCCTGCCTTCATTTTGTCCATAGCTTAAATGGTTACAGT	10	-	2496290	2501660	gi|755532756|ref|XR_871427.1|
NONMMUT061956	0.412772	0.00051383	1.63624	up	122.874	149.984	114.747	100.464	104.861	107.906	6.47968	6.6224	6.49085	5.90682	5.82827	5.72669	TATATTCTTACTTGACCAAGGTGCCAAAGAAGTAATGCCAGGGAACTGAGAGAGCAAGAG	14	+	596606	604219	gi|755549681|ref|XR_874725.1|	7555	NC	105245788	LOC105245788	NC	0.0991258	0.000163273	3.44688	down	104.242	81.5915	160.792	795.767	662.643	522.838	7.13388	6.93519	7.11155	9.057	8.813	8.6665	TGAGAGCACACCGCTAAAGGTTTTCAGCAAGGAATTTAGAGTGTAAATAAAAGGCCTAGC	7	-	74824221	74826189	NONMMUT061956
NONMMUT026052	0.437473	0.000732058	5.51216	up	2063.34	1914.65	1220.52	409.023	295.993	463.814	10.4473	10.4056	9.89655	7.89594	7.40769	8.05798	GTCAATTGGATCAGATAATGGGCCTGCCTTCATTTTGTCCATAGCTTAAATGGTTACAGT	10	-	2496290	2501660	gi|755532756|ref|XR_871427.1|	1091	NC	105245099	LOC105245099	NC	0.151238	0.00410578	1.90984	down	37.8481	39.5495	52.4948	138.578	142.989	163.942	5.75867	5.94952	5.69341	6.64499	6.55219	7.00478	TTCATATGTGGAGTTGGAGGAGAGGTTATTCCTGTTTCCTATGGAATTAGCACTGGGAAA	16	+	25072275	25073120	NONMMUT026052
Gm14630	0.503622	0.00197031	2.19088	up	207.075	271.768	194.524	144.632	135.855	126.371	7.18926	7.49947	7.24932	6.39138	6.19372	5.9584	ATATCTAAATGTGTGTTTGGTATTTCTTCCCAAGGGAACTGTCTTTCGGGCGTGGCTCCA	12	+	2297445	2299376	gi|568898563|ref|XR_394319.1|	1299	NC	102642954	LOC102642954	NC	0.217062	0.0165185	1.51217	down	648.723	671.67	1319.21	2653.88	1918.21	1800.7	9.81353	10.0067	10.0748	10.8163	10.4078	10.4609	TAGAAGTTCTACTCAGTCATTGTGGACTACAGCAAACTGAAGAAAGAAGGCCCAGACTTC	X	-	54884886	54885131	NONMMUT072549
ri|F730117H04|PL00010G12|3945	0.547131	0.00403439	1.7229	up	2320.22	1947.98	1611.73	1500.12	1166.99	1308.37	10.6273	10.4306	10.3101	9.81953	9.49561	9.69834	CCCAATGAACAATAGAAGTTCTACTCACTCAATGTGGACTACAGCAAACTGAAGAAAAAA	X	+	5561890	5562129	NONMMUT071676	240	NONMMUT071676	NONMMUG044411.2	Gm14450	1	0.195141	0.0105623	1.79469	down	425.794	272.336	579.451	1403.98	1343.57	967.596	9.20498	8.69669	8.89119	9.8881	9.88698	9.54897	TGTGTGTTTATGTGTATGTACACAAATGCACAGGTGCTGTTATACATATGTATGTATGTG	12	+	3980554	3984500	ri|F730117H04|PL00010G12|3945
NONMMUT066428	0.571361	0.00650092	1.65854	up	1403.98	1343.57	967.596	855.956	818.063	960.449	9.8881	9.88698	9.54897	8.97266	8.95075	9.2109	TGTGTGTTTATGTGTATGTACACAAATGCACAGGTGCTGTTATACATATGTATGTATGTG	12	+	3980554	3984500	ri|F730117H04|PL00010G12|3945	3945	NC	NC	NC	NC	0.306295	0.04749	1.90027	down	64.9007	105.372	161.445	359.87	275.351	372.27	6.44669	7.31684	7.11652	7.9577	7.51802	8.18295	TTCCGAAAGAGAGAGCTCCGCTTCTTGCTGGAGGACAAATACCAAAAGGATTAAAGGCAT	8	+	4993407	4994305	ri|2410038B05|ZX00047L17|369
NONMMUT055321	0.571411	0.0071856	1.68465	up	200.811	284.148	217.418	180.026	160.522	201.417	7.14544	7.56194	7.40873	6.69745	6.44858	6.71272	TTCTTGTGCTGGGGATGAACTAAGGAATCAAGGATAGACCTTGATGGAGTTGTGGCAAAG	11	+	72257274	72258065	NONMMUT010600	698	NONMMUT010600	NONMMUG006667.1	NC	2	0.148668	0.00372256	1.65939	down	47.8554	40.9599	82.3573	182.099	162.348	132.103	6.04355	5.9927	6.21155	7.01282	6.73557	6.69135	GCACCCTGTCCTATGTTTTTCCTTTGTTGCCATAAAGGCTGTCATTTTTTGTATATTACC	5	+	148341514	148343321	NONMMUT055321
NONMMUT018037	0.575222	0.00910335	1.51309	up	795.767	662.643	522.838	502.322	498.25	556.6	9.057	8.813	8.6665	8.18727	8.1997	8.35703	TGAGAGCACACCGCTAAAGGTTTTCAGCAAGGAATTTAGAGTGTAAATAAAAGGCCTAGC	7	-	74824221	74826189	NONMMUT061956	1970	NONMMUT061956	NONMMUG038274.2	NC	1	0.308178	0.0481123	1.72866	down	206.629	165.264	513.431	960.306	810.039	557.856	8.13708	7.96589	8.72107	9.32101	9.10929	8.76273	ATTGGGAAGACCATCATATTGAAGAACCATGTCAAAGTTCTCCAGGACATACAAGATTCA	13	+	66262284	66278605	NONMMUT018037
NONMMUT046055	0.575897	0.00929919	1.56442	up	182.099	162.348	132.103	138.221	133.28	130.454	7.01282	6.73557	6.69135	6.33073	6.1652	6.00693	GCACCCTGTCCTATGTTTTTCCTTTGTTGCCATAAAGGCTGTCATTTTTTGTATATTACC	5	+	148341514	148343321	NONMMUT055321	712	NONMMUT055321	NONMMUG034352.1	NC	2	0.291247	0.0411059	1.85675	down	61.6558	55.9659	58.9214	195.059	156.986	229.671	6.38062	6.40407	5.81619	7.10489	6.68715	7.48718	ACAGGCATTCAACAGTACAGTAATACTCTAATATGTGTGGTTCATGAACATAAAACTGAG	4	+	6615309	6639371	NONMMUT046055
LOC105245788	0.594314	0.0123313	1.66831	up	324.565	297.964	329.679	200.971	278.759	250.939	7.81466	7.63565	8.00998	6.85455	7.31109	7.07948	AACAAAATGCAGGCAGAAAGACTCAACCTATATGTAGACAAGAACCACTCCATGGGCTGG	11	-	46260716	46261687	NONMMUT009484	964	NONMMUT009484	NONMMUG005921.2	NC	2	0.185208	0.00887669	1.56386	down	44.5831	43.3623	49.7558	122.874	149.984	114.747	5.95399	6.06446	5.63915	6.47968	6.6224	6.49085	TATATTCTTACTTGACCAAGGTGCCAAAGAAGTAATGCCAGGGAACTGAGAGAGCAAGAG	14	+	596606	604219	gi|755549681|ref|XR_874725.1|
NONMMUT049932	0.594314	0.0133599	1.68915	up	166.928	122.855	137.994	98.4039	120.757	114.791	6.89273	6.3341	6.75526	5.88022	6.01992	5.81304	CGGCTGCCCCAGACGGCAACCACAGTTCAAAACCAGATTAAAATAAAACGTTAATCCGCC	6	+	202892	205112	ri|A930002A02|PX00065J23|2223	2223	NONMMUT056087	NC	NC	NC	0.296922	0.0429945	1.55154	down	241.003	275.462	550.372	1039.8	721.047	885.271	8.36503	8.71325	8.8167	9.4474	8.92962	9.41908	TGAGCAGAAGAAACAGGAAATCCTGAAGAAGTAAGCAACTTGGGCATCAGGAGGATTGCT	4	-	133089057	133089352	NONMMUT049932
Gm14450	0.594314	0.0138222	1.76054	up	569.484	587.114	718.878	468.321	453.095	381.869	8.59647	8.64016	9.11321	8.08751	8.05171	7.76256	GTGCACATATGCTTCTTCTTGTATATGTTGATGTATGTGTGCTTGTGTTGAACAGCATTA	5	+	53673049	53674748	NONMMUT052321	1703	NONMMUT052321	NONMMUG032487.2	NC	1	0.13879	0.00238751	1.83968	down	503.266	561.402	918.377	2320.22	1947.98	1611.73	9.43734	9.74309	9.54921	10.6273	10.4306	10.3101	CCCAATGAACAATAGAAGTTCTACTCACTCAATGTGGACTACAGCAAACTGAAGAAAAAA	X	+	5561890	5562129	NONMMUT071676
NONMMUT009122	0.597624	0.0146842	3.04094	up	11138.2	9836.91	8537.82	6044.98	2487.63	3964.74	13.1173	12.9728	12.7528	11.9424	10.652	11.4351	AGAGAGGTCCATTTGAGTTGGTCGTAGTGACAGTGAGCTTCTCTGGAAATTGCGTATCCT	8	-	3594757	3595409	gi|755528033|ref|XR_879317.1|	443	NC	105243318	LOC105243318	NC	0.27825	0.0357331	1.94399	down	41.1085	71.6596	104.184	252.379	199.488	233.848	5.85432	6.75237	6.52557	7.4569	7.04048	7.51194	GTTTGAGCCCAAATCCTGTGAGTACATATGCCTTCACACATATTTAAGAAACTAAAGAAA	11	-	969958	970634	ri|A530092E22|PX00143G01|677
Gm17767	0.604617	0.0166671	1.6139	up	283.091	302.137	329.096	206.586	278.22	240.753	7.62101	7.65663	8.00739	6.893	7.30783	7.01255	AGTGTGGTAATAAGTCTGCTGATTCCTGTGTCTTTTTCACTGTCTGCTCTAACACAGAAG	1	-	1632166	1646483	gi|755493096|ref|XR_865419.1|	889	NC	100045066	Gm17767	NC	0.310147	0.0493819	1.80895	down	95.0092	54.9642	190.42	283.091	302.137	329.096	7.00016	6.38018	7.33923	7.62101	7.65663	8.00739	AGTGTGGTAATAAGTCTGCTGATTCCTGTGTCTTTTTCACTGTCTGCTCTAACACAGAAG	1	-	1632166	1646483	gi|755493096|ref|XR_865419.1|
NONMMUT056087	0.604617	0.0170139	1.82117	up	173.105	164.368	114.791	127.251	90.7251	108.81	6.94482	6.75348	6.49157	6.21293	5.64308	5.73927	TGAAACGTTCCCCTAAGGAATTGGCTCTTCAGCTGGGATAAGCAAACAGATTTAAGGGCT	16	-	1909200	1910338	ri|4933413H08|PX00642I15|1142	1142	NONMMUT026491	NC	NC	NC	0.199531	0.0116177	1.72796	down	44.7339	33.3955	63.4366	166.928	122.855	137.994	5.95936	5.7527	5.90281	6.89273	6.3341	6.75526	CGGCTGCCCCAGACGGCAACCACAGTTCAAAACCAGATTAAAATAAAACGTTAATCCGCC	6	+	202892	205112	ri|A930002A02|PX00065J23|2223
Gm8812	0.604617	0.0173343	2.11937	up	656.799	1048.8	685.506	351.147	525.161	488.591	8.79387	9.50977	9.0486	7.67984	8.27649	8.14499	CGGGCTGGGGAGCCAACTAAATCTGATGAAAATGCAATTGCCAAGTCGTTAAGGTATTTG	17	+	48229239	48232590	NONMMUT029925	1634	NONMMUT029925	NONMMUG018488.2	NC	2	0.194989	0.0104543	1.814	down	615.982	526.913	1427.77	2270.5	2592.5	2119.85	9.73328	9.64869	10.1953	10.5959	10.8764	10.6825	TAGACAACAAGATTGAGCAGGCCATGGATCTAGTGAGGAATCTTCTGATGTGAGAGAGGA	1	+	66109539	66109950	NONMMUT001302
NONMMUT036982	0.604617	0.0178139	1.69017	up	1039.8	721.047	885.271	714.975	571.672	578.605	9.4474	8.92962	9.41908	8.7058	8.39884	8.41996	TGAGCAGAAGAAACAGGAAATCCTGAAGAAGTAAGCAACTTGGGCATCAGGAGGATTGCT	4	-	133089057	133089352	NONMMUT049932	204	NONMMUT049932	NONMMUG030919.1	NC	2	0.162324	0.00508645	1.62293	down	38.8233	40.9741	71.5912	123.913	148.395	144.506	5.78824	5.99335	6.04587	6.4926	6.60532	6.82534	TAAGAGCACCAGGAGACTCAAGCTTGGTACCTGTGATGCTTAAGTTGCTTTGAGACACAT	2	+	38371616	38380217	NONMMUT036982
NONMMUT026491	0.604617	0.0206366	1.5355	up	138.578	142.989	163.942	116.149	144.891	127.006	6.64499	6.55219	7.00478	6.09112	6.28799	5.96674	TTCATATGTGGAGTTGGAGGAGAGGTTATTCCTGTTTCCTATGGAATTAGCACTGGGAAA	16	+	25072275	25073120	NONMMUT026052	552	NONMMUT026052	NONMMUG016119.2	NC	2	0.269987	0.0326698	1.52688	down	40.8963	48.5171	88.0608	173.105	164.368	114.791	5.84828	6.21215	6.29768	6.94482	6.75348	6.49157	TGAAACGTTCCCCTAAGGAATTGGCTCTTCAGCTGGGATAAGCAAACAGATTTAAGGGCT	16	-	1909200	1910338	ri|4933413H08|PX00642I15|1142
Gm12638	0.604617	0.0208921	2.24707	up	191.627	284.498	305.314	102.412	172.427	183.776	7.0794	7.56423	7.90103	5.9323	6.55471	6.55351	TGATGTTTGTCTCTCTGGGGACCTCTGTGGTTACTGCTTTGTTGTGAATAAATAAGACAT	15	-	2576988	2578006	ri|A330077P12|PX00133C18|1019	1019	NONMMUT023865	NC	NC	NC	0.130637	0.00195079	2.67162	up	456.629	299.555	710.11	312.184	258.476	300.597	9.29964	8.83093	9.18068	7.75902	7.42088	7.8782	GTAGAAGACAAGGATTATTTCTTATTTAGAGATGGTAACATTCTTGGAAAGCACGTGGAC	4	-	92039742	92040039	NONMMUT048097
NONMMUT008958	0.604617	0.0221215	2.58216	up	313.651	140.834	159.561	73.2219	110.404	107.384	7.7667	6.53056	6.96496	5.53737	5.89912	5.71999	GCTCATTGCGACTCTTGAGTACAAAACAAAAACAAAACTCCCCTGTTCAAATAAACAAAA	10	-	63392638	63553025	NONMMUT005919	545	NONMMUT005919	NONMMUG003822.1	NC	2	0.272167	0.0334408	2.1377	up	1232.4	2114.93	4274.08	1857.08	1827.94	1618.47	10.7359	11.6423	11.8599	10.2968	10.3362	10.3168	AAACAAGACATGAAAACTGGAGGGATGCAGGAGTCATTTCCTGGAGTATGTAAAGATGGT	11	+	24079459	24080839	NONMMUT008958
NONMMUT030368	0.604617	0.0222573	2.40337	up	257.303	259.46	156.484	134.674	75.4166	162.131	7.4835	7.42783	6.93731	6.29169	5.41317	6.3486	TCAAAAGTTAATCTAGCAGTTAAGCCCTGAGTTCAACTCCCAGTAATATACACCTACATG	10	+	94786136	94787253	NONMMUT006946	921	NONMMUT006946	NONMMUG004468.2	NC	2	0.199531	0.0115842	4.04331	up	233.063	90.9933	139.347	38.6523	60.6173	57.0195	8.31653	7.09271	6.91612	5.19971	5.46233	5.61671	AGAGTTTCCTCTGAATAAGAAGACATGACTCTCAGAGACCCCGTGAGATTAAATTAAGAC	17	+	4165482	4167494	ri|B230307C02|PX00159E12|2013
NONMMUT016058	0.604617	0.022276	1.61852	up	123.913	148.395	144.506	130.586	111.157	104.483	6.4926	6.60532	6.82534	6.24887	5.90909	5.68127	TAAGAGCACCAGGAGACTCAAGCTTGGTACCTGTGATGCTTAAGTTGCTTTGAGACACAT	2	+	38371616	38380217	NONMMUT036982	539	NONMMUT036982	NONMMUG022768.2	NC	3	0.268448	0.0319488	2.52948	up	262.639	156.937	768.051	189.934	226.915	208.261	8.48531	7.88698	9.29009	7.07043	7.22703	7.3484	ACAAAAACACAGGACTTCCAAAGATCAGGTTTATTAAAGGCACTGAGGGTTCCCGAGAGC	12	-	3263747	3266161	ri|4930403I12|PX00715E06|2416
NONMMUT059135	0.604617	0.0222847	1.57068	up	5779.75	7063.55	7251.79	4670.95	5489.66	4339.98	12.0691	12.4282	12.4905	11.5362	11.9224	11.5752	TTTCTAAGATCAGGCGTGTGTGGTCATTGGTTTTGAGTGCTGTACCTTGTTGTCTGTCCT	8	-	122065547	122067998	NONMMUT067405	2453	NONMMUT067405	NONMMUG041739.2	NC	1	0.186083	0.00923168	2.07149	up	1425.3	1322.26	1982.84	1275.99	1669.57	941.435	10.945	10.9752	10.682	9.74419	10.1983	9.50762	AGGTGGAGCAAAAGCTAATTCGACTTCCTCCTCCACCTCAGCACTTTTACTTTGTCCTTT	6	+	132225009	132226507	NONMMUT059135
LOC102642954	0.604617	0.0226986	1.51872	up	2653.88	1918.21	1800.7	1807.3	1380.56	1628.94	10.8163	10.4078	10.4609	10.0968	9.74705	10.0325	TAGAAGTTCTACTCAGTCATTGTGGACTACAGCAAACTGAAGAAAGAAGGCCCAGACTTC	X	-	54884886	54885131	NONMMUT072549	246	NONMMUT072549	NONMMUG044956.2	Gm14630	1	0.108271	0.000610512	1.94092	up	223.808	209.542	365.328	207.075	271.768	194.524	8.25433	8.31467	8.23927	7.18926	7.49947	7.24932	ATATCTAAATGTGTGTTTGGTATTTCTTCCCAAGGGAACTGTCTTTCGGGCGTGGCTCCA	12	+	2297445	2299376	gi|568898563|ref|XR_394319.1|
NONMMUT052321	0.604678	0.0230823	1.70193	up	2270.5	2592.5	2119.85	2136.42	1420.56	1325.02	10.5959	10.8764	10.6825	10.3436	9.79041	9.71924	TAGACAACAAGATTGAGCAGGCCATGGATCTAGTGAGGAATCTTCTGATGTGAGAGAGGA	1	+	66109539	66109950	NONMMUT001302	412	NONMMUT001302	NONMMUG000880.2	Gm8812	1	0.232758	0.0203182	1.54567	up	471.789	452.942	862.87	569.484	587.114	718.878	9.34988	9.42845	9.45622	8.59647	8.64016	9.11321	GTGCACATATGCTTCTTCTTGTATATGTTGATGTATGTGTGCTTGTGTTGAACAGCATTA	5	+	53673049	53674748	NONMMUT052321
NONMMUT067758	0.604678	0.0231027	2.04954	up	879.106	729.554	655.339	329.969	622.838	417.147	9.18413	8.94676	8.98481	7.58631	8.53394	7.88956	CCAGCCTGAGCTAGTGTGAGACCCTTTCCTTAACTGAAAAAATAAAATAATAGAATCTTA	9	+	1383356	1386506	ri|D030011M09|PX00179K16|3152	3152	NONMMUT070530	NC	NC	NC	0.253249	0.0258213	1.54299	up	4420.45	4557.57	5350.88	4664.42	5643.3	4530.06	12.6009	12.7124	12.2202	11.7445	12.0849	11.827	GAAAATAATTGCTGCAAAAGATGACTCTGCCTCTCCCTCGGGCCTCAGTTTACACTTCAT	8	+	128483974	128488232	NONMMUT067758
NONMMUT048902	0.607912	0.0253063	1.78191	up	312.184	258.476	300.597	259.809	178.221	200.935	7.75902	7.42088	7.8782	7.24093	6.60851	6.7084	GTAGAAGACAAGGATTATTTCTTATTTAGAGATGGTAACATTCTTGGAAAGCACGTGGAC	4	-	92039742	92040039	NONMMUT048097	298	NONMMUT048097	NONMMUG029840.2	Gm12638	1	0.127142	0.00130914	1.89375	up	254.565	228.64	420.486	228.768	275.139	270.257	8.44526	8.44057	8.43752	7.32254	7.51689	7.72017	CCCCTGATTGTGAATCTCTCTTTGTATGCAGGTTGTACTCGCAAAACAAGGATCATTGAT	4	-	116826977	116827786	NONMMUT048902
NONMMUT067405	0.60815	0.0255387	1.54296	up	252.379	199.488	233.848	195.919	202.024	178.851	7.4569	7.04048	7.51194	6.81834	6.80627	6.50761	GTTTGAGCCCAAATCCTGTGAGTACATATGCCTTCACACATATTTAAGAAACTAAAGAAA	11	-	969958	970634	ri|A530092E22|PX00143G01|677	677	NONMMUT009122	NC	NC	NC	0.252661	0.0255259	1.87128	up	7502.09	7985.08	7653.24	5779.75	7063.55	7251.79	13.371	13.5351	12.7938	12.0691	12.4282	12.4905	TTTCTAAGATCAGGCGTGTGTGGTCATTGGTTTTGAGTGCTGTACCTTGTTGTCTGTCCT	8	-	122065547	122067998	NONMMUT067405
Hspe1-ps6	0.608678	0.0277276	1.75492	up	228.768	275.139	270.257	241.437	169.291	174.706	7.32254	7.51689	7.72017	7.12864	6.52502	6.47172	CCCCTGATTGTGAATCTCTCTTTGTATGCAGGTTGTACTCGCAAAACAAGGATCATTGAT	4	-	116826977	116827786	NONMMUT048902	601	NONMMUT048902	NONMMUG030373.1	NC	2	0.20388	0.0130237	1.56183	up	1520.32	1352.26	2844.12	2431.21	1689.28	1804.8	11.0482	11.0124	11.2323	10.6828	10.2167	10.4635	GTAGAAGACAAGGATTATTTCTTATTTAGAGATGGTGACATTCTTGGAAAGTATGTGGAC	4	-	95739115	95739397	NONMMUT048197
NONMMUT047212	0.620277	0.0306848	1.55517	up	2431.21	1689.28	1804.8	1798.22	1271.17	1350.08	10.6828	10.2167	10.4635	10.0872	9.61456	9.75011	GTAGAAGACAAGGATTATTTCTTATTTAGAGATGGTGACATTCTTGGAAAGTATGTGGAC	4	-	95739115	95739397	NONMMUT048197	283	NONMMUT048197	NONMMUG029883.2	Hspe1-ps6	1	0.288121	0.0399754	1.56272	up	141.426	93.2469	196.01	130.621	202.542	118.084	7.5795	7.12873	7.37732	6.56357	7.0586	6.53121	GTCTATTTAATAACAATGATGATGGACTGGGTGTTAGGTCCCTTGTACGTTACAAATTAC	4	-	3551322	3553669	ri|B020016M11|PX00325H04|1730
ri|5830470F21|PX00645F20|2544	0.623406	0.03482	2.35463	up	195.059	156.986	229.671	155.173	89.7291	89.0623	7.10489	6.68715	7.48718	6.48671	5.62809	5.45792	ACAGGCATTCAACAGTACAGTAATACTCTAATATGTGTGGTTCATGAACATAAAACTGAG	4	+	6615309	6639371	NONMMUT046055	964	NONMMUT046055;NONMMUT046056	NONMMUG028432.2	NC	6	0.267995	0.0312022	1.51945	up	229.729	314.004	450.569	338.293	404.349	317.766	8.2946	8.89728	8.5322	7.87467	8.08221	7.95654	TCTGGAGGGTCTACTGGGTGCATTTAGTTAGGATGCCAGACACTTCACATTGTTCTTTCA	17	-	2053014	2055557	ri|5830470F21|PX00645F20|2544
NONMMUT037662	0.623406	0.0420597	1.55326	up	359.87	275.351	372.27	243.642	300.472	266.315	7.9577	7.51802	8.18295	7.14217	7.43221	7.1784	TTCCGAAAGAGAGAGCTCCGCTTCTTGCTGGAGGACAAATACCAAAAGGATTAAAGGCAT	8	+	4993407	4994305	ri|2410038B05|ZX00047L17|369	369	NONMMUT066428	NC	NC	NC	0.209166	0.014526	1.90823	up	228.48	212.304	252.651	236.271	226.314	159.648	8.28546	8.33393	7.73247	7.36717	7.22255	6.96544	ATGTATCATTCTTCTCCCTTTCATCTGACTCCCCTAAAACTTCCTTATGGGGGGAGGTGA	2	-	2222631	2259733	ri|4930412C07|PX00639K22|638
NONMMUT054594	0.623406	0.0463716	2.69522	up	338.293	404.349	317.766	315.78	134.103	123.365	7.87467	8.08221	7.95654	7.52625	6.17478	5.92119	TCTGGAGGGTCTACTGGGTGCATTTAGTTAGGATGCCAGACACTTCACATTGTTCTTTCA	17	-	2053014	2055557	ri|5830470F21|PX00645F20|2544	2544	NC	NC	NC	NC	0.272846	0.0338026	1.58041	up	441.664	408.721	828.048	552.097	774.258	421.707	9.25378	9.27973	9.3965	8.55793	9.039	8.3522	AAACTGAGAGACACTTGTATTTACATCTTGTCCTCATGCTATCCCCATCCAAAAAGCCCT	5	-	3420627	3423867	ri|A330030G03|PX00130N10|3239
[truncated: 5 more columns]

## Sheet: common mRNAs in stomach
Table SIII. List of common lncRNAs and mRNAs in the AM group vs NC group and the H-CP group vs AM group in the stomach.
Probe name	Gene symbol	AM group vs NC group										H-CP group vs AM group
		P-value (Corr)	P-value	FC (abs)	Regulation	PX-1W:rProcessedSignal(normalized)	PC-1W:rProcessedSignal(normalized)	PC-2W:rProcessedSignal(normalized)	NX-2W:rProcessedSignal(normalized)	NC-1W:rProcessedSignal(normalized)	NC-3W:rProcessedSignal(normalized)	p (Corr)	p	FC (abs)	Regulation	GX-3W:rProcessedSignal(normalized)	GC-1W:rProcessedSignal(normalized)	GC-3W:rProcessedSignal(normalized)	PX-1W:rProcessedSignal(normalized)	PC-1W:rProcessedSignal(normalized)	PC-2W:rProcessedSignal(normalized)
A_55_P2088720	1200016E24Rik	0.591794	0.0102194	2.76336	up	14.4128	14.316	14.2479	13.4314	12.3371	12.809	0.129651	0.00161779	2.28793	down	13.3125	13.2481	12.834	14.4128	14.316	14.2479
A_55_P2006604	2810474O19Rik	0.604617	0.0225905	1.62689	up	9.79917	10.2573	10.3508	9.54003	9.51441	9.24655	0.247278	0.0239714	2.01781	down	8.79365	9.01058	9.56474	9.79917	10.2573	10.3508
A_55_P1957213	3930401B19Rik	0.571361	0.00660569	2.54751	up	14.8771	14.6829	14.5464	13.6555	12.8743	13.5293	0.140392	0.00273288	1.79072	down	14.0196	13.831	13.7342	14.8771	14.6829	14.5464
A_55_P2270437	4930528J11Rik	0.60815	0.025941	2.67518	up	10.2638	9.86421	8.92381	8.17576	8.14308	8.47412	0.198439	0.0112619	4.75384	down	7.00346	7.25804	8.04307	10.2638	9.86421	8.92381
A_51_P316935	8430408G22Rik	0.605468	0.0245018	1.69409	up	7.05761	6.94554	7.17798	6.36356	6.61968	5.91635	0.283776	0.037833	2.18899	down	5.37756	5.79643	6.61635	7.05761	6.94554	7.17798
A_52_P116628	8430419L09Rik	0.623406	0.0420053	2.81628	up	10.1986	9.70998	9.42343	8.8244	7.38333	8.64294	0.227727	0.0192718	2.06951	down	8.91027	8.86374	8.41016	10.1986	9.70998	9.42343
A_55_P2017924	A630089N07Rik	0.623406	0.0444272	1.5277	down	13.7495	14.2556	14.0414	14.3273	14.7302	14.8229	0.21728	0.0166564	1.61367	down	13.2851	13.1859	13.5044	13.7495	14.2556	14.0414
A_55_P2117395	A730009L09Rik	0.616852	0.0293894	1.6724	down	7.23858	7.51444	7.69726	8.06843	8.0244	8.58322	0.275104	0.0344986	1.50348	up	8.27104	8.11872	7.82544	7.23858	7.51444	7.69726
A_52_P162509	Ahcyl2	0.594314	0.0118876	2.23422	up	13.7559	13.1409	13.2637	11.9405	12.1632	12.5775	0.139408	0.00248497	2.49173	down	12.0088	12.1698	12.0305	13.7559	13.1409	13.2637
A_55_P2444515	Akap2	0.594314	0.0112763	1.97656	up	9.52475	8.80773	8.98018	8.21393	8.06489	8.08487	0.216245	0.0161546	2.13504	down	7.85882	8.34538	7.82568	9.52475	8.80773	8.98018
A_55_P2083841	Atp13a1	0.594314	0.0141271	1.63061	up	7.48459	7.29188	7.1083	6.71161	6.72748	6.32944	0.177438	0.00744303	1.60242	up	8.03965	7.8133	8.07257	7.48459	7.29188	7.1083
A_55_P2016139	Atp6ap1l	0.623406	0.0383813	1.51411	down	6.91043	6.8669	7.28393	7.4287	7.52281	7.90515	0.182561	0.00840284	1.81266	down	6.09314	6.39229	6.0015	6.91043	6.8669	7.28393
A_55_P1956147	B4galnt2	0.503622	0.00169281	2.15454	up	8.90018	8.61091	8.51285	7.51256	7.44414	7.7451	0.267025	0.0307401	1.54469	down	7.81686	8.33549	7.98965	8.90018	8.61091	8.51285
A_55_P1975235	Bicd1	0.591794	0.0104744	2.03402	up	7.91744	7.50493	7.14207	6.50824	6.44769	6.53549	0.179598	0.00764047	2.53603	down	5.91801	6.17828	6.44044	7.91744	7.50493	7.14207
A_66_P136389	Bmpr1b	0.594314	0.0115842	1.90533	up	8.51579	8.40262	7.962	7.27312	7.20464	7.61253	0.302439	0.0457055	2.12403	down	7.12097	7.83314	6.66588	8.51579	8.40262	7.962
A_52_P466853	Bmyc	0.594314	0.0119366	2.47645	up	11.0535	10.3107	11.1379	9.80972	9.35548	9.41205	0.259123	0.0277639	2.28652	down	9.38912	10.1116	9.42189	11.0535	10.3107	11.1379
A_51_P398467	Bsdc1	0.604678	0.0228043	1.7135	up	7.64141	7.50537	7.23699	7.0282	6.60651	6.4182	0.149885	0.00382948	1.64384	up	8.16813	8.17333	8.19352	7.64141	7.50537	7.23699
A_55_P1995339	Btnl6	0.502715	0.00140577	1.50896	down	5.77514	5.7338	5.69631	6.25614	6.47235	6.25743	0.27283	0.0336621	3.34224	up	8.54952	6.75141	7.12678	5.77514	5.7338	5.69631
A_55_P2088178	Cbln2	0.623406	0.0481287	1.65557	down	11.334	11.8502	11.77	11.9737	12.5653	12.5971	0.151238	0.00398974	2.14374	down	10.3774	10.6885	10.588	11.334	11.8502	11.77
A_55_P1980521	Ccdc85a	0.608535	0.0270699	2.2471	up	8.79673	8.24565	8.90226	7.98654	7.038	7.41591	0.268448	0.0318189	2.60639	down	6.64703	7.94406	7.2074	8.79673	8.24565	8.90226
A_55_P1979526	Cdkn2b	0.623406	0.0361195	2.00378	up	7.49212	7.43922	7.10761	6.11208	5.98013	6.93858	0.302439	0.0456935	2.21023	down	5.7088	6.95127	5.9463	7.49212	7.43922	7.10761
A_51_P135268	Corin	0.519126	0.00245378	2.63933	up	8.34186	7.76227	7.75426	6.41653	6.61322	6.62812	0.183599	0.00862882	4.83324	down	4.82184	6.18778	6.02979	8.34186	7.76227	7.75426
A_55_P2074488	Crim1	0.614319	0.0288671	1.70627	up	7.88112	7.33272	7.6975	6.97701	6.5411	7.08068	0.239305	0.0219794	1.68158	down	6.63501	6.97225	7.05462	7.88112	7.33272	7.6975
A_55_P2004016	Crispld2	0.623406	0.0385762	1.51158	up	10.1296	9.87222	9.87164	9.69175	9.30578	9.08774	0.277805	0.0354785	1.69514	down	8.89821	9.04604	9.64498	10.1296	9.87222	9.87164
A_51_P489522	Ctla2b	0.622243	0.0317851	1.65586	up	7.41111	7.21165	7.32978	7.02267	6.40707	6.34005	0.286915	0.0393639	1.84022	down	5.97611	6.37561	6.96118	7.41111	7.21165	7.32978
A_51_P245796	Ddit4	0.437473	0.000657451	1.76433	up	7.8163	7.54819	7.66023	6.91652	6.85595	6.79489	0.163156	0.00522614	1.63464	down	6.82368	6.91053	7.16359	7.8163	7.54819	7.66023
A_51_P487678	Dtnbp1	0.622243	0.0309526	1.52726	up	8.12663	7.89934	8.48216	7.71664	7.48371	7.47495	0.309843	0.0489377	1.69338	down	7.10965	7.81949	7.2993	8.12663	7.89934	8.48216
A_55_P2046378	Eif4g1	0.623406	0.0487043	1.5131	up	8.76257	8.22275	8.15711	7.89623	7.85512	7.59856	0.246625	0.0237668	1.65333	up	9.09516	8.99056	9.23283	8.76257	8.22275	8.15711
A_66_P130115	Fads2	0.622243	0.0326574	2.03076	down	10.5613	9.77631	9.55016	11.0983	11.0426	10.8129	0.262586	0.0289236	2.20441	up	11.3562	10.8325	11.1203	10.5613	9.77631	9.55016
A_51_P425824	Fam132a	0.604617	0.0213569	2.44568	down	5.94325	5.66503	5.95238	6.78127	7.82021	6.82989	0.0991258	0.000214204	6.28936	up	8.80984	8.17309	8.53646	5.94325	5.66503	5.95238
A_55_P2074831	Fam168a	0.469641	0.00115041	1.73359	up	8.25693	8.36724	8.34041	7.69883	7.39558	7.48888	0.218575	0.0171002	1.55202	down	7.46907	7.99414	7.59892	8.25693	8.36724	8.34041
A_52_P592101	Fam21	0.623406	0.0456505	1.7227	up	9.72179	9.64476	9.91151	9.40152	9.02467	8.49785	0.151238	0.00405837	1.89351	down	8.57131	8.98278	8.96079	9.72179	9.64476	9.91151
A_52_P357445	Fgd4	0.623406	0.0455283	1.53596	up	9.71159	9.52552	10.0168	9.01113	8.93334	9.45198	0.185208	0.00889997	2.30206	down	8.16446	8.8799	8.60074	9.71159	9.52552	10.0168
A_55_P2058895	Fktn	0.623406	0.0346019	1.54492	up	8.67859	8.48397	8.47586	8.28381	7.65817	7.81384	0.108271	0.000656214	1.72729	down	7.77402	7.8321	7.66676	8.67859	8.48397	8.47586
A_55_P2065334	Gm14308	0.623406	0.042229	1.63772	down	11.7134	12.0568	11.7657	12.1353	12.6798	12.8559	0.172915	0.00694307	1.98926	down	10.7531	11.1704	10.6357	11.7134	12.0568	11.7657
A_51_P493886	Gpt2	0.591794	0.0103604	1.7293	up	9.84381	9.65682	9.58962	9.06859	8.595	9.0561	0.303886	0.0462455	1.69475	down	8.4493	9.31556	9.04216	9.84381	9.65682	9.58962
A_51_P454190	Hecw2	0.604617	0.0209375	2.38264	up	8.25363	7.40952	7.90585	6.60103	6.19909	7.01119	0.253875	0.0260218	3.81793	down	5.08345	6.82477	5.8624	8.25363	7.40952	7.90585
A_55_P2046245	Hes1	0.622243	0.032113	1.82751	up	7.73618	7.79881	7.41621	7.25206	6.44819	6.64131	0.290143	0.0406653	2.16194	down	6.20917	6.16011	7.24494	7.73618	7.79881	7.41621
A_52_P32369	Hmgn3	0.623406	0.0333915	2.32722	up	9.27	8.28434	8.25473	7.23902	7.15779	7.75644	0.293738	0.0418679	2.39319	down	6.89637	7.32044	7.81546	9.27	8.28434	8.25473
A_66_P109720	Hn1l	0.570532	0.00586959	1.52024	up	10.9415	10.868	11.0085	10.146	10.51	10.3492	0.237772	0.0215962	1.86828	up	11.4756	12.3014	11.7463	10.9415	10.868	11.0085
A_52_P240542	Id2	0.499139	0.00132382	1.55613	up	11.4364	11.603	11.4756	10.9908	10.8051	10.8051	0.205741	0.0134812	2.25688	down	9.97142	10.1525	10.868	11.4364	11.603	11.4756
A_52_P253179	Igfbp3	0.571411	0.00792189	2.36905	up	9.04876	8.65702	8.42072	7.77736	7.44138	7.17483	0.182904	0.00852009	2.20802	down	7.50632	7.34044	7.85149	9.04876	8.65702	8.42072
A_55_P2131725	LOC100045026	0.594314	0.013206	5.92407	down	4.62421	4.61419	4.61028	6.65323	8.38891	6.5063	0.230885	0.0199628	22.4976	up	11.3044	7.18037	8.83902	4.62421	4.61419	4.61028
A_52_P332788	LOC102639105	0.623406	0.0436218	2.48309	down	7.41862	7.70185	7.39075	7.95372	9.09764	9.39628	0.250127	0.0248909	1.64312	up	8.02575	8.05719	8.57759	7.41862	7.70185	7.39075
A_55_P1969845	Lrpprc	0.604617	0.0223959	2.07701	up	11.2051	11.1465	10.8655	9.47854	10.3486	10.2265	0.20382	0.0128954	1.77718	down	9.96934	10.2249	10.5342	11.2051	11.1465	10.8655
A_55_P1961499	Ly6c1	0.623406	0.0382837	2.01185	up	11.6269	11.0627	11.3216	10.8885	10.169	9.92807	0.213817	0.0156867	2.39077	down	9.58245	10.4907	10.1656	11.6269	11.0627	11.3216
A_51_P418168	Manf	0.611161	0.0284717	1.53872	up	10.527	10.549	10.1435	10.038	9.60328	9.71299	0.219133	0.0171766	1.74668	up	11.5101	10.9778	11.1454	10.527	10.549	10.1435
A_51_P282179	Mtor	0.604617	0.0184089	1.53397	up	9.87883	9.51902	9.74682	9.17814	8.85888	9.25585	0.247545	0.0240575	1.70866	down	8.75867	9.32493	8.74247	9.87883	9.51902	9.74682
A_55_P2004588	Nabp2	0.529415	0.00260984	1.58452	up	7.47094	7.41143	7.29722	6.62689	6.66196	6.89861	0.127142	0.00129754	1.71542	up	8.32073	8.1579	8.03665	7.47094	7.41143	7.29722
A_51_P141535	Oat	0.622243	0.03293	1.58566	up	9.77572	9.19773	9.28554	8.93586	8.57448	8.75341	0.248443	0.0243495	1.5768	down	8.82425	8.66567	8.79808	9.77572	9.19773	9.28554
A_55_P2135153	Obp2a	0.412772	0.000431761	12.3818	up	10.0783	10.3874	9.56186	6.04466	6.2508	6.84165	0.163596	0.00528423	15.6745	down	5.5209	7.38456	5.21106	10.0783	10.3874	9.56186
A_52_P663413	P4ha2	0.623406	0.0384496	1.94758	up	6.84057	6.91865	6.85245	5.9087	5.36243	6.4555	0.130637	0.00187742	2.00021	down	5.68368	6.13251	5.79502	6.84057	6.91865	6.85245
A_52_P191567	Plcl1	0.604617	0.0175524	1.84722	up	7.2208	6.55021	6.79355	5.94978	5.78154	6.17717	0.307644	0.0477732	2.06737	down	5.53466	6.43615	5.45035	7.2208	6.55021	6.79355
A_51_P279038	Ppargc1a	0.556988	0.00482134	2.85056	up	12.5933	12.9822	12.3885	10.7762	11.4762	11.1778	0.214292	0.0157748	3.21972	down	10.9016	11.6582	10.3433	12.5933	12.9822	12.3885
A_66_P113599	Prss23os	0.594314	0.0115282	2.58762	up	11.9785	11.4791	11.6199	10.3841	9.82039	10.7581	0.279276	0.036235	2.35345	down	9.895	11.1542	10.324	11.9785	11.4791	11.6199
A_55_P1987694	Ptprd	0.604617	0.0209069	1.93164	up	11.2377	10.7007	10.507	10.0748	9.61251	9.90856	0.260819	0.0285054	3.31041	down	8.37948	9.96802	8.91681	11.2377	10.7007	10.507
A_55_P2039230	Pydc4	0.620116	0.0304299	1.73082	up	6.69037	7.31056	6.75223	6.21455	5.85438	6.30985	0.194439	0.010385	2.20404	down	5.6274	6.08594	5.61937	6.69037	7.31056	6.75223
A_51_P293938	Rasl11b	0.623406	0.0395084	1.58227	up	7.42481	7.48991	7.37623	7.1971	6.61605	6.49179	0.143714	0.00305791	1.55124	down	6.75649	6.97487	6.65933	7.42481	7.48991	7.37623
A_51_P515496	Rbm17	0.556689	0.00473429	1.61459	up	10.4519	10.217	10.291	9.80492	9.45888	9.62268	0.117814	0.000852618	1.5764	up	10.9359	10.9771	11.0168	10.4519	10.217	10.291
A_55_P1968399	Rdh7	0.591794	0.0103117	1.53364	up	8.44227	8.43792	8.38491	7.81033	7.57002	8.03387	0.114693	0.000780781	2.40231	down	7.42163	7.08374	6.96647	8.44227	8.43792	8.38491
A_51_P226269	Rgcc	0.622243	0.032101	1.97041	up	7.11795	7.28708	6.6549	6.35687	5.57669	6.19088	0.305397	0.0466863	1.95006	down	5.94746	5.63309	6.58882	7.11795	7.28708	6.6549
A_55_P2051094	Rorc	0.393783	0.000245395	3.15619	up	10.6222	10.4787	10.1789	8.80496	8.70846	8.79176	0.199531	0.0113988	2.1691	down	9.22957	9.7163	8.98258	10.6222	10.4787	10.1789
A_51_P498388	Sbk1	0.575222	0.0088331	1.78317	up	7.17261	6.99018	7.35223	6.61044	6.25553	6.14572	0.279123	0.0361653	1.73631	down	6.08048	6.83866	6.2078	7.17261	6.99018	7.35223
A_66_P132510	Scamp3	0.604617	0.0197021	1.75496	up	9.1379	8.92897	9.56554	8.59595	8.22946	8.37269	0.27283	0.0337304	1.55939	down	8.69408	8.43365	8.58174	9.1379	8.92897	9.56554
A_55_P1979595	Sepn1	0.574035	0.00806127	1.52076	down	9.26027	9.11968	9.34791	9.67918	9.82536	10.0377	0.130637	0.00187209	2.23892	down	7.79132	8.24494	8.20317	9.26027	9.11968	9.34791
A_55_P1979377	Slc16a7	0.605468	0.0237047	1.87072	up	13.1517	12.6758	12.545	11.8788	11.5883	12.1946	0.288762	0.040269	3.11627	down	10.7318	12.1777	10.5436	13.1517	12.6758	12.545
A_55_P1989663	Slco3a1	0.60815	0.0257149	2.01744	up	8.76448	8.97196	9.18246	7.71147	7.67739	8.49247	0.15636	0.00449766	3.58246	down	6.745	7.71295	6.93811	8.76448	8.97196	9.18246
A_55_P2085142	Spp1	0.623406	0.0476082	7.07015	down	8.0677	6.71663	8.07048	11.1613	11.4915	8.66722	0.209166	0.0146285	4.73699	up	9.26557	10.0431	10.278	8.0677	6.71663	8.07048
A_51_P483473	St3gal5	0.623406	0.0484468	2.26248	up	12.0959	11.0119	11.2168	9.87044	10.1764	10.7441	0.240164	0.0220841	3.31275	down	9.2708	9.48788	10.3818	12.0959	11.0119	11.2168
A_55_P2005475	Sult1a1	0.594314	0.0110038	2.0178	up	8.28676	8.24069	7.93351	7.42472	7.23586	6.76203	0.146512	0.00341843	1.63103	down	7.40769	7.44259	7.49332	8.28676	8.24069	7.93351
A_51_P331059	Tex15	0.623406	0.03582	1.74088	up	8.20961	7.42258	8.06246	7.1796	6.92289	7.19271	0.248443	0.0243274	3.29842	down	5.66724	7.01922	5.84287	8.20961	7.42258	8.06246
A_55_P2131642	Trim50	0.571411	0.00737446	2.95637	up	10.8379	10.3598	10.2561	8.85784	8.51452	9.38998	0.296922	0.0430702	3.16344	down	8.15948	9.89115	8.41873	10.8379	10.3598	10.2561
A_51_P164393	Txndc2	0.611161	0.0283919	1.88844	up	7.87574	7.36381	7.53938	6.22321	6.8501	6.95403	0.228211	0.0193805	3.27071	down	5.42063	6.73468	5.4948	7.87574	7.36381	7.53938
A_55_P2071952	Wdr92	0.617063	0.029921	2.14715	up	14.0474	13.9765	13.6134	12.6734	12.3063	13.3503	0.151238	0.00406198	1.94871	down	12.8764	12.7828	13.0906	14.0474	13.9765	13.6134
A_51_P486217	Wnk4	0.604617	0.0226451	1.57509	up	8.83363	8.76784	8.69733	8.17125	7.77772	8.38353	0.305494	0.0467794	1.61447	down	8.17761	8.43007	7.61795	8.83363	8.76784	8.69733
A_51_P168792	Xylb	0.604617	0.0215027	1.96525	up	6.8201	6.63562	6.40094	5.36034	5.45785	6.11433	0.268448	0.0317525	1.65753	down	5.62519	5.78667	6.2577	6.8201	6.63562	6.40094
